# Supplementary material for: Immunoinformatics Design and Assessment of a Multiepitope Antigen (OvMCBL02) for Onchocerciasis Diagnosis and Monitoring
Source: MDPI journal article supplement (doi:10.3390/diagnostics12061440), 2022-06-11
Supplement: s1 [file s1]

## Article

# Immunoinformatics Design and Assessment of a Multiepitope Antigen (OvMCBL02) for Onchocerciasis Diagnosis and Monitoring

**Table S1:** Homology prediction of proteins with signal peptides

| Homology blast                                                                             | Protein ID                                                                                                                                                                                                                                                                                                                                                                                                                                                                                                                                                                                                                                                                                                                                                                                                                                                                                                                                                                                                                                                                                                                                                                                                                                                                                                                                                                                                                                                                                                                                                                                                              |
|--------------------------------------------------------------------------------------------|-------------------------------------------------------------------------------------------------------------------------------------------------------------------------------------------------------------------------------------------------------------------------------------------------------------------------------------------------------------------------------------------------------------------------------------------------------------------------------------------------------------------------------------------------------------------------------------------------------------------------------------------------------------------------------------------------------------------------------------------------------------------------------------------------------------------------------------------------------------------------------------------------------------------------------------------------------------------------------------------------------------------------------------------------------------------------------------------------------------------------------------------------------------------------------------------------------------------------------------------------------------------------------------------------------------------------------------------------------------------------------------------------------------------------------------------------------------------------------------------------------------------------------------------------------------------------------------------------------------------------|
| Not conserved in related nematodes (<30% similarity in both UniProt and BLASTp data-bases) | OVOC7606, OVOC10207, OVOC5909, OVOC8529, OVOC8936, OVOC9989, OVOC10037, OVOC5574, OVOC8498                                                                                                                                                                                                                                                                                                                                                                                                                                                                                                                                                                                                                                                                                                                                                                                                                                                                                                                                                                                                                                                                                                                                                                                                                                                                                                                                                                                                                                                                                                                              |
| Conserved in related nematodes (>30% similarity in both UniProt and BLASTp data-bases)     | OVOC9892, OVOC9855, OVOC9725, OVOC9497, OVOC9403, OVOC9322, OVOC9058, OVOC8895, OVOC8585, OVOC8491, OVOC8413, OVOC8359, OVOC82, OVOC8118, OVOC8072, OVOC7872, OVOC7843, OVOC7777, OVOC7748, OVOC7660, OVOC7454, OVOC7453, OVOC7373, OVOC7328, OVOC727, OVOC6997, OVOC6944, OVOC693, OVOC68, OVOC6669, OVOC6639, OVOC6422, OVOC6203, OVOC10067, OVOC10263, OVOC10476, OVOC10654, OVOC10802, OVOC10602, OVOC10872, OVOC10939, OVOC11417, OVOC11487, OVOC11516, OVOC11845, OVOC11951, OVOC12274, OVOC12359, OVOC12449, OVOC1287, OVOC1536, OVOC1709, OVOC193, OVOC2249, OVOC2366, OVOC243, OVOC2493, OVOC2683, OVOC281, OVOC2991, OVOC3048, OVOC3290, OVOC3523, OVOC3864, OVOC387, OVOC4153, OVOC4177, OVOC4230, OVOC4680, OVOC4952, OVOC5288, OVOC5386, OVOC5967, OVOC6112, OVOC6381, OVOC6908, OVOC6942, OVOC7011, OVOC7138, OVOC7265, OVOC7292, OVOC7617, OVOC7804, OVOC8052, OVOC8395, OVOC8665, OVOC8677, OVOC89, OVOC8919, OVOC9161, OVOC9325, OVOC9326, OVOC9327, OVOC9592, OVOC9593, OVOC9726, OVOC9818, OVOC9984, OVOC9988, OVOC9990, OVOC10071, OVOC10371, OVOC10382, OVOC1058, OVOC10635, OVOC10769, OVOC10860, OVOC10873, OVOC10910, OVOC11026, OVOC11170, OVOC11411, OVOC6875, OVOC11707, OVOC12067, OVOC12077, OVOC12148, OVOC12472, OVOC12476, OVOC12488, OVOC12544, OVOC12649, OVOC13508, OVOC140, OVOC1512, OVOC12236, OVOC11881, OVOC1662, OVOC1743, OVOC1952, OVOC1978, OVOC2208, OVOC2262, OVOC235, OVOC2424, OVOC2544, OVOC2978, OVOC311, OVOC3120, OVOC3665, OVOC37, OVOC4051, OVOC4100, OVOC4148, OVOC4447, OVOC4636, OVOC4906, OVOC589, OVOC5121, OVOC5169, OVOC5280, OVOC5640, OVOC5935, OVOC6038 |
